# Supplementary figures and images for: Effect of functionalized graphene oxide with a hyperbranched cyclotriphosphazene polymer on mechanical and thermal properties of cyanate ester composites
Source: Royal Society of Chemistry journal article supplement (doi:10.1039/c4ra06411a), 2014-09-17

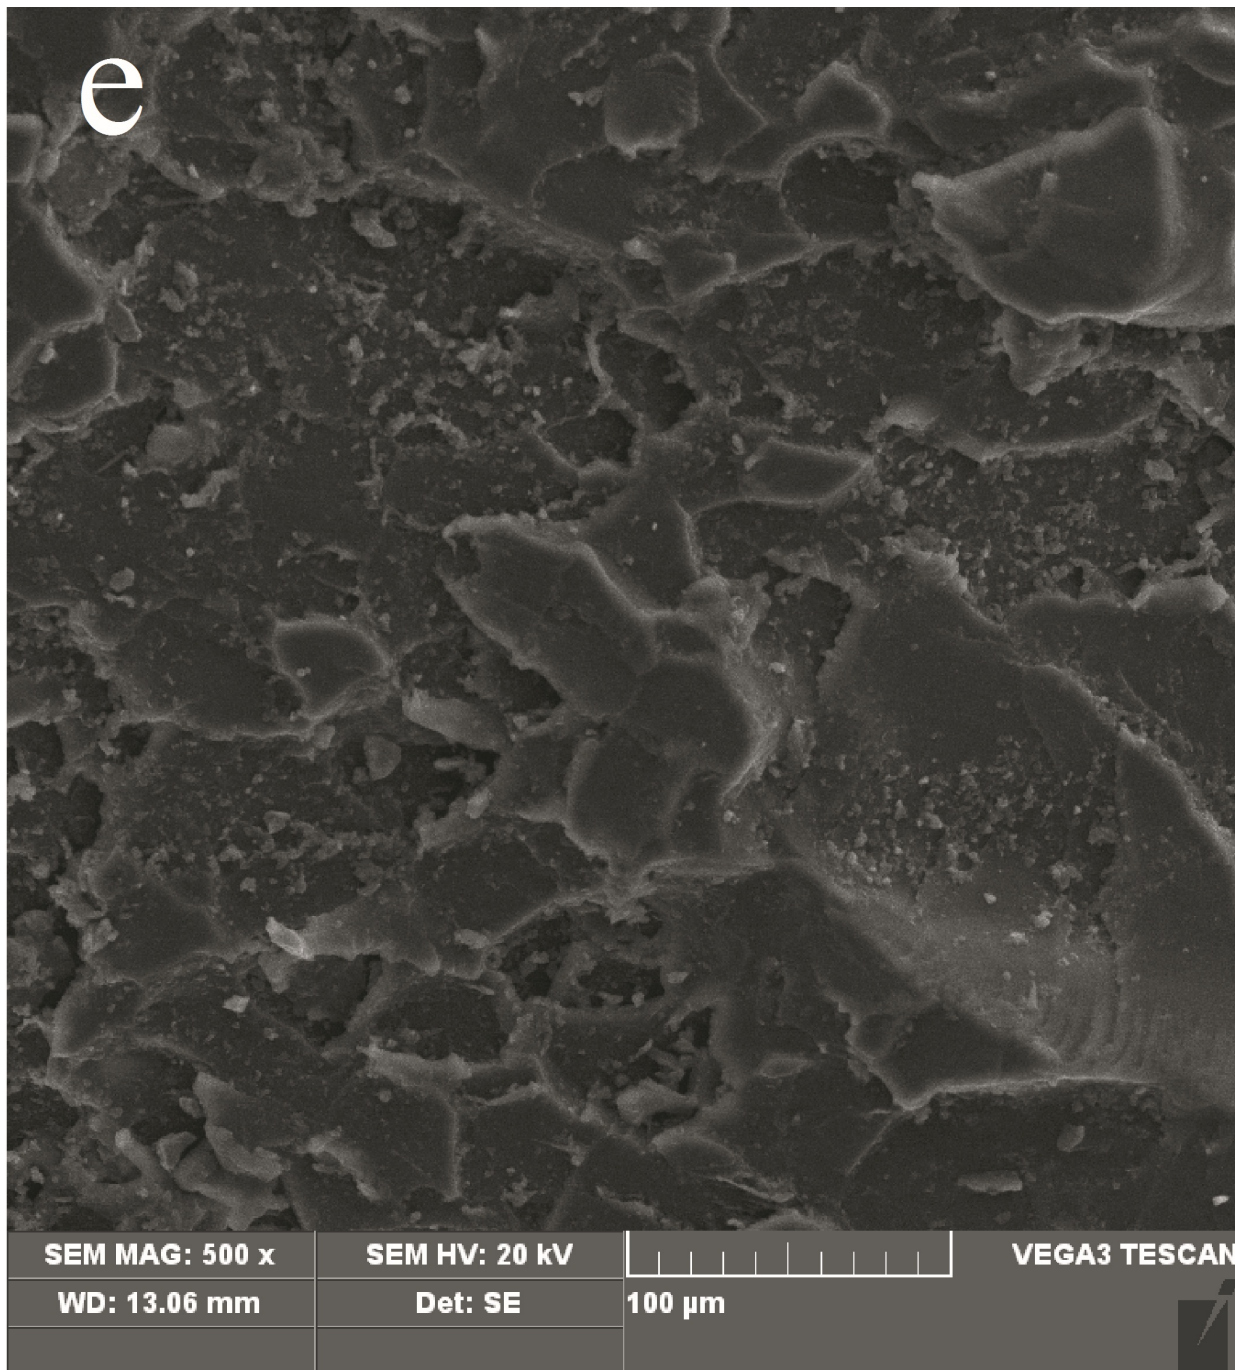

Supplement: c4ra06411a2.pdf [file c4ra06411a2.pdf]
